# Supplementary material
Source: Springer Nature journal article supplement (https://www.springermedizin.de/resource/supplementary/12888_2010_742_MOESM7_ESM.pdf/9478012)
Supplement: MOESM7 [file 9478012]

Records identified through database searching  
(n = 3637)

Additional records identified through other sources  
(n = 32)

Records after duplicates removed  
(n = 3669)

Records screened  
(n=3669)

Records excluded  
(n = 3377)

Full-text articles assessed for eligibility  
(n = 292)

Excluded (n = 270)  
121 = Does not ask about barriers or facilitators  
88 = Not for depression or anxiety  
32 = Not young adults (12-25yrs)  
11 = Review  
11 = Not from community  
5 = Parent carer  
2 = Data not extractable

Studies included in qualitative synthesis  
(n = 22)
